# Supplementary material
Source: publisher figshare collection journal article supplement (https://aacr.figshare.com/articles/dataset/_/23905211)
Supplement: Supplementary file 1 [file 41911394]

**Supplemental Table 5.** List of known tumour suppressor genes significantly under expressed in patients identified as having del(1p) in RNA-seq data from the CoMMpass dataset.

**A. Del(1p12):** Using copy number loss of *TENT5C* to identify cases.

|                | <b>Locus</b> | <b>log2FC</b> | <b>q</b> |
|----------------|--------------|---------------|----------|
| <i>RPL5</i>    | 1p22.1       | -0.76709      | 6.76E-08 |
| <i>AHCYL1</i>  | 1p13.2       | -0.69366      | 7.53E-13 |
| <i>TENT5C</i>  | 1p12         | -0.64323      | 5.23E-08 |
| <i>DENND2D</i> | 1p13.3       | -0.63875      | 3.58E-10 |
| <i>RAP1A</i>   | 1p13.3       | -0.61127      | 1.40E-07 |
| <i>SH3GLB1</i> | 1p22         | -0.5836       | 1.25E-09 |
| <i>USP33</i>   | 1p31.1       | -0.3552       | 0.003196 |

**B. Del(1p22.1):** Using copy number loss of *RPL5* to identify cases.

|                | <b>Locus</b> | <b>log2FC</b> | <b>q</b> |
|----------------|--------------|---------------|----------|
| <i>RPL5</i>    | 1p22.1       | -1.00716      | 1.66E-21 |
| <i>SH3GLB1</i> | 1p22         | -0.66944      | 4.81E-21 |
| <i>USP33</i>   | 1p31.1       | -0.48638      | 1.17E-12 |
| <i>AHCYL1</i>  | 1p13.2       | -0.5256       | 4.93E-08 |
| <i>BCL10</i>   | 1p22         | -0.53858      | 9.01E-08 |
| <i>DENND2D</i> | 1p13.3       | -0.47082      | 2.04E-06 |
| <i>RAP1A</i>   | 1p13.3       | -0.46628      | 5.07E-05 |
| <i>DNAJB4</i>  | 1p31.1       | -0.60394      | 0.000562 |
| <i>GBP1</i>    | 1p22.2       | -0.97733      | 0.002797 |
| <i>MIR186</i>  | 1p31.1       | -0.49367      | 0.034487 |
